# Supplementary material
Source: publisher figshare collection journal article supplement (https://sage.figshare.com/ndownloader/files/18109814)
Supplement: Supplementary file 1 [file 18109814]

## Antimicrobial evaluation of the constituents isolated from *Macropidia fuliginosa* (Hook.) Druce.

Robert Brkljača<sup>a,\*</sup>, Hans-Martin Dahse<sup>b</sup>, Kerstin Voigt<sup>c, d</sup> and Sylvia Urban<sup>a\*</sup>

<sup>a</sup> School of Science (Applied Chemistry and Environmental Science), RMIT University, GPO Box 2476 Melbourne, Victoria, 3001, Australia

<sup>b</sup> Department of Infection Biology, Leibniz Institute for Natural Product Research and Infection Biology, Hans Knöll Institute, Adolf-Reichwein-Straße 23, 07745 Jena, Germany

<sup>c</sup> Jena Microbial Resource Collection, Leibniz Institute for Natural Product Research and Infection Biology, Hans Knöll Institute, Adolf-Reichwein-Straße 23, 07745 Jena, Germany

<sup>d</sup> Friedrich Schiller University, Faculty of Biological Sciences, Institute of Microbiology, Neugasse 25, 07745 Jena, Germany

### Supporting Information

**S1.** Proton Chemical Shift Comparison of literature NMR data of 3-phenyl-1,2-dihydroacenaphthylen-1,2-diol (**7**) to that of compound (**7**) isolated in this study.

**S2.** Carbon Chemical Shift Comparison of literature NMR data of 3-phenyl-1,2-dihydroacenaphthylen-1,2-diol (**7**) to that of compound (**7**) isolated in this study.

**S3.** HMBC NMR data comparison of literature NMR data of 3-phenyl-1,2-dihydroacenaphthylen-1,2-diol (**7**) to that of compound (**7**) isolated in this study.

**S4.** <sup>1</sup>H NMR spectrum (500 MHz, CDCl<sub>3</sub>) of 3-phenyl-1,2-dihydroacenaphthylen-1,2-diol (**7**).

**S5.** gCOSY NMR spectrum (500 MHz, CDCl<sub>3</sub>) of 3-phenyl-1,2-dihydroacenaphthylen-1,2-diol (**7**).

**S6.** HSQCAD NMR spectrum (500 MHz, CDCl<sub>3</sub>) of 3-phenyl-1,2-dihydroacenaphthylen-1,2-diol (**7**).

**S7.** gHMBCAD NMR spectrum (500 MHz, CDCl<sub>3</sub>) of 3-phenyl-1,2-dihydroacenaphthylen-1,2-diol (**7**).

---

\*Corresponding authors. Tel: +61 3 9925 3376 (SU) and +61 3 9925 1233 (RB)

E-mail addresses: [sylvia.urban@rmit.edu.au](mailto:sylvia.urban@rmit.edu.au) (S. Urban) and [robert.brkljaca@rmit.edu.au](mailto:robert.brkljaca@rmit.edu.au) (R. Brkljača)

**S1. Proton Chemical Shift Comparison of literature NMR data of 3-phenyl-1,2-dihydroacenaphtylen-1,2-diol (7) to that of compound (7) isolated in this study.**

| Compound (7) isolated in this study | Literature data                     |
|-------------------------------------|-------------------------------------|
| 7.86, d (8.5)                       | 7.87, d (8.4)                       |
| 7.78, d (7.0)                       | 7.78, bd (7.0)                      |
| 7.66, d (8.5)                       | 7.64, m                             |
| 7.60, m                             | Included as part of $\delta_H$ 7.64 |
| 7.58, dd (7.0, 8.0)                 | 7.52, t (7.4)                       |
| 7.50, dd (7.0, 8.0)                 | Included as part of $\delta_H$ 7.78 |
| 7.41, t (7.0)                       | 7.43, d (7.4)                       |
| 5.62, d (5.5)                       | 5.64, d (5.6)                       |
| 5.52, d (5.5)                       | 5.54, d (5.6)                       |

**S2. Carbon Chemical Shift Comparison of literature NMR data of 3-phenyl-1,2-dihydroacenaphtylen-1,2-diol (7) to that of compound (7) isolated in this study.**

| Compound (7) isolated in this study | Literature data |
|-------------------------------------|-----------------|
| 142.9, C                            | 142.81, C       |
| 139.7, C                            | 139.00, C       |
| 138.5, C                            | 138.40, C       |
| 136.4, C                            | 136.43, C       |
| 135.7, C                            | 130.37, C       |
| 130.4, C                            | 129.96, CH      |
| 129.9, CH                           | 128.91, CH      |
| 128.9, CH                           | 128.83, C       |
| 128.7, CH                           | 128.74, CH      |
| 128.3, CH                           | 128.32, CH      |
| 127.5, CH                           | 157.52, CH      |
| 126.1, CH                           | 126.14, CH      |
| 124.7, CH                           | 124.74, CH      |
| 121.4, CH                           | 121.39, CH      |
| 74.3, CH                            | 74.32, CH       |
| 72.6, CH                            | 72.59, CH       |

**S3. HMBC NMR data comparison of literature NMR data of 3-phenyl-1,2-dihydroacenaphtylen-1,2-diol (7) to that of compound (7) isolated in this study.**

| Compound (7) isolated in this study |                                           | Literature data                     |                                |
|-------------------------------------|-------------------------------------------|-------------------------------------|--------------------------------|
| Proton                              | gHMBCAD                                   | Proton                              | gHMBCAD                        |
| 7.86, d (8.5)                       | 136.4, 135.7, 130.4, 124.7                | 7.87, d (8.4) 5                     | 128.83, 124.74                 |
| 7.78, d (7.0)                       | 136.4, 135.7, 128.9, 127.5, 126.1w, 121.4 | 7.78, bd (7.0) 6, 2'3'5'6'          | 128.83, 127.54, 126.14, 121.39 |
| 7.66, d (8.5)                       | 139.7, 138.5, 130.4, 126.1w               | 7.64, m 4'                          | 138.40, 130.37                 |
| 7.60, m                             | 136.4, 124.7, 74.3w                       | Included as part of $\delta_H$ 7.64 | -                              |
| 7.58, dd (7.0, 8.0)                 | 142.9, 130.4                              | 7.52, t (7.4) 7                     | 139.00, 128.83                 |
| 7.50, dd (7.0, 8.0)                 | 139.7, 128.7                              | Included as part of $\delta_H$ 7.78 | -                              |
| 7.41, t (7.0)                       | 128.9                                     | 7.43, d (7.4) 8                     | 128.83                         |
| 5.62, d (5.5)                       | 142.9, 138.5w, 136.4                      | 5.64, d (5.6) 1                     | -                              |
| 5.52, d (5.5)                       | 142.9, 138.5w, 136.4, 121.4w              | 5.54, d (5.6) 2                     | 142.81, 136.43                 |

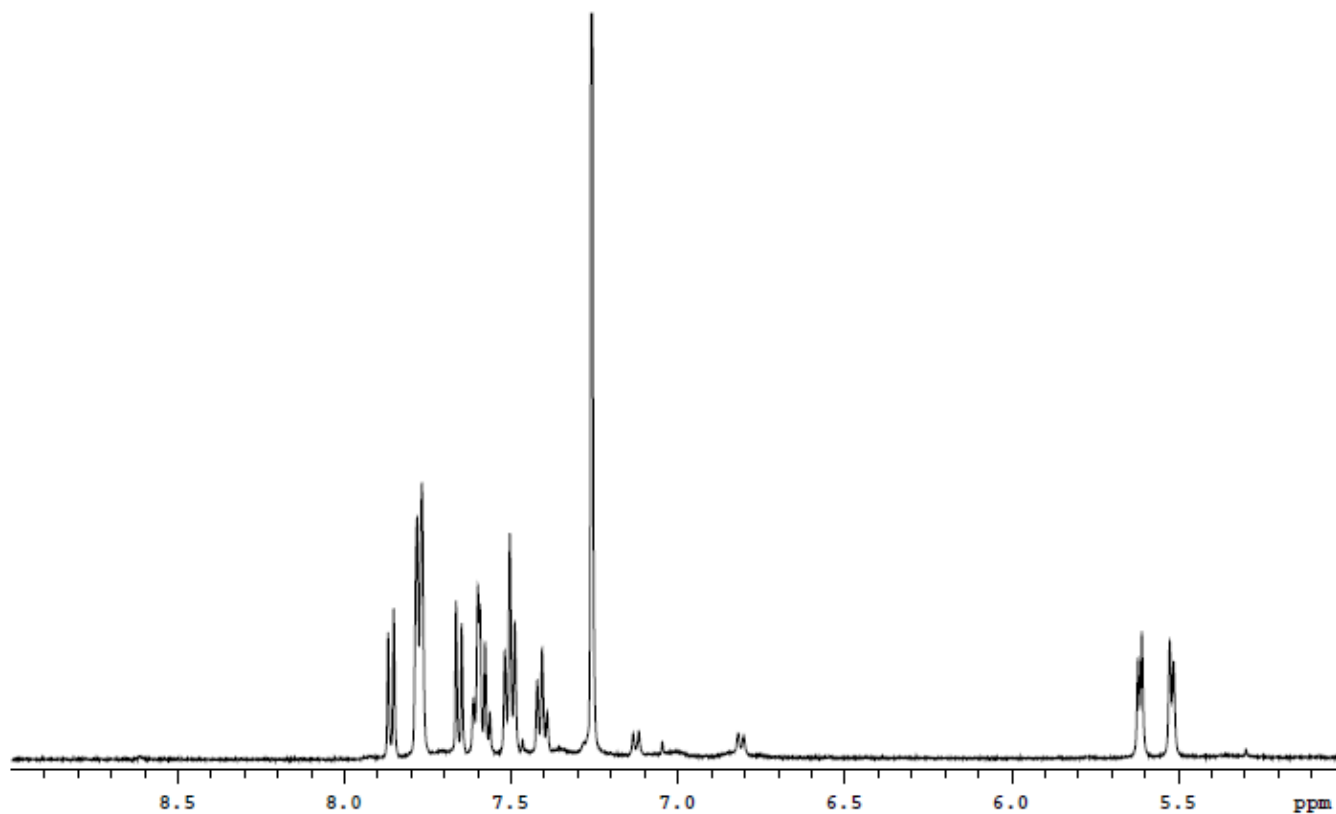

**S4.**  $^1\text{H}$  NMR spectrum (500 MHz,  $\text{CDCl}_3$ ) of 3-phenyl-1,2-dihydroacenaphthylen-1,2-diol (**7**).

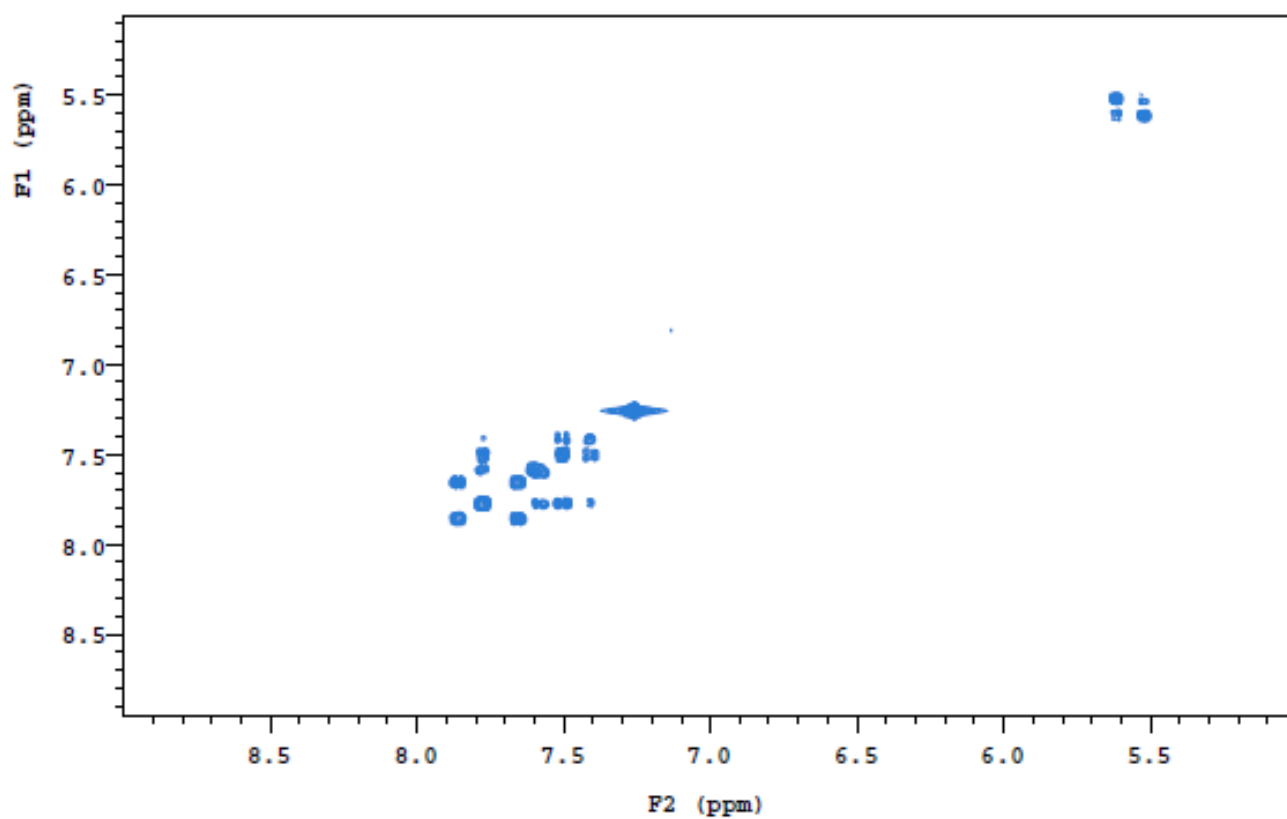

**S5.** gCOSY NMR spectrum (500 MHz,  $\text{CDCl}_3$ ) of 3-phenyl-1,2-dihydroacenaphthylen-1,2-diol (**7**).

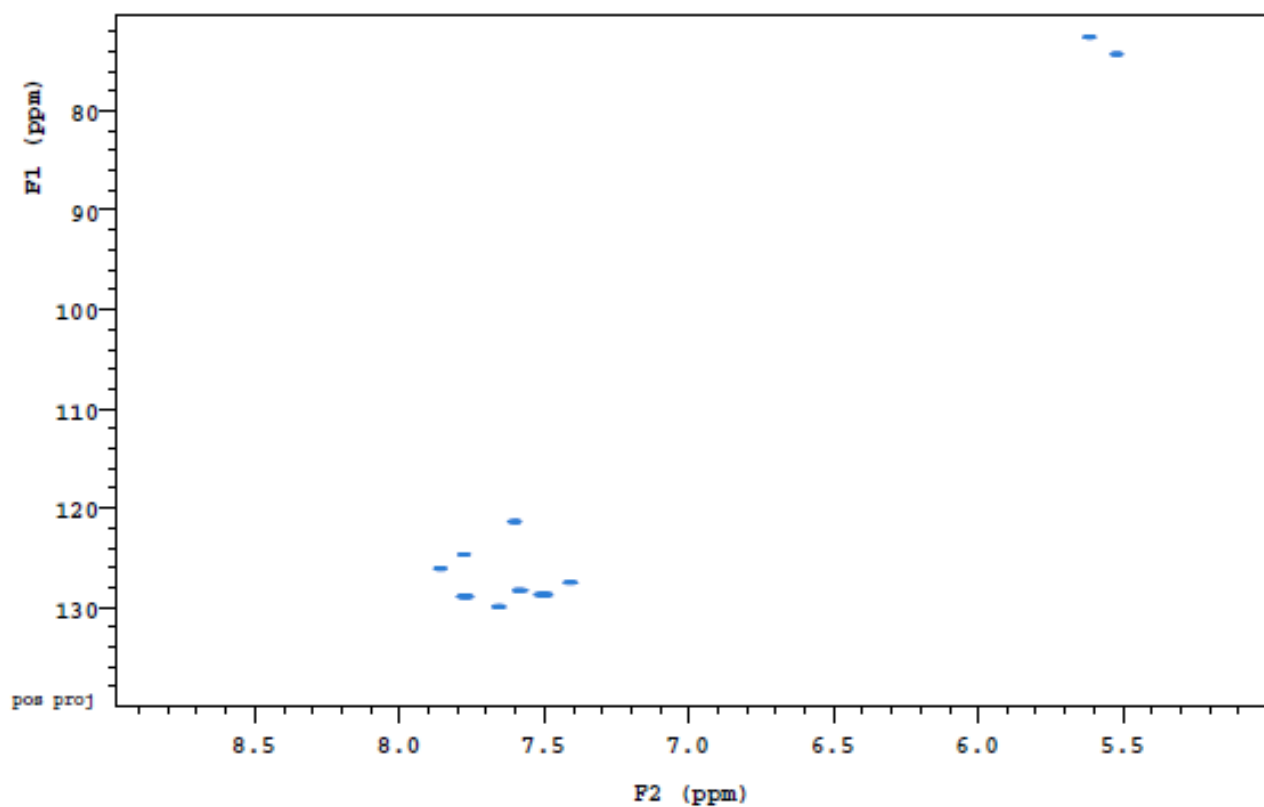

S6. HSQCAD NMR spectrum (500 MHz, CDCl<sub>3</sub>) of 3-phenyl-1,2-dihydroacenaphthylen-1,2-diol (7).

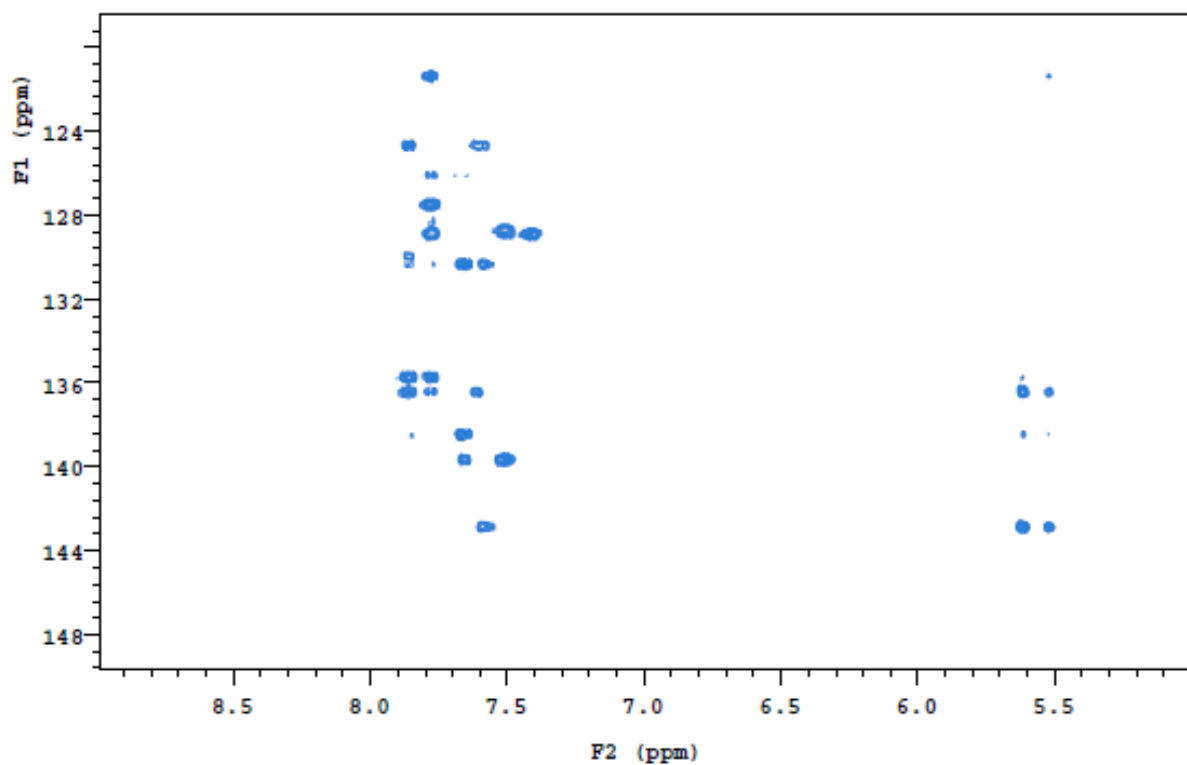

S7. gHMBCAD NMR spectrum (500 MHz, CDCl<sub>3</sub>) of 3-phenyl-1,2-dihydroacenaphthylen-1,2-diol (7).
